# Supplementary material for: Three-dimensional reduced graphene oxide decorated with cobalt metaphosphate as high cost-efficiency electrocatalysts for the hydrogen evolution reaction
Source: Royal Society of Chemistry journal article supplement (doi:10.1039/d2ra01271e), 2022-01-01
Supplement: d2ra01271e1.pdf [file d2ra01271e1.pdf]

## Supporting information

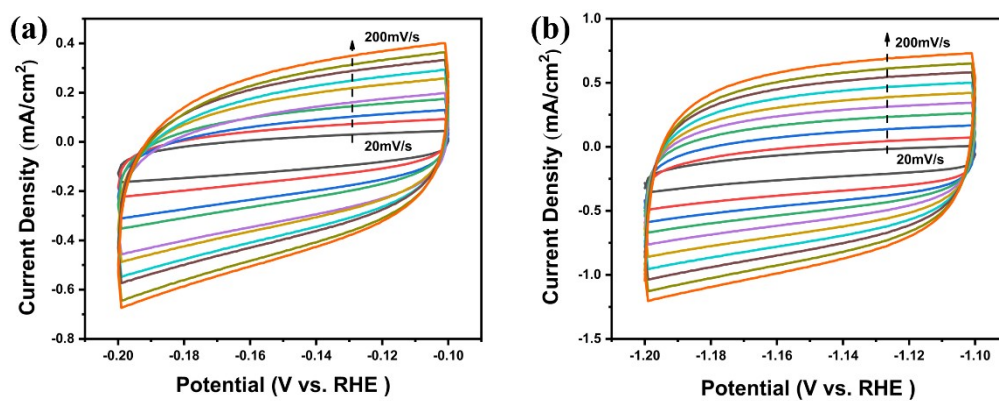

**Fig. S1.** Cyclic voltammograms of 3D RGO at a scan rate of 20-200 mV s<sup>-1</sup> (a) in 0.5 M H<sub>2</sub>SO<sub>4</sub>, (b) in 1 M KOH.
